# Supplementary material for: Photo-crosslinked hierarchically honeycomb-patterned/macroporous scaffolds of calcium phosphate cement promote MC3T3-E1 cell functions
Source: Royal Society of Chemistry journal article supplement (doi:10.1039/c5ra01332a), 2015-01-01
Supplement: c5ra01332a1.pdf [file c5ra01332a1.pdf]

Supplementary Information

**Photo-crosslinked hierarchically honeycomb-patterned/macroporous scaffolds of calcium phosphate cement promote MC3T3-E1 cell functions**

X. H. Wu,<sup>a</sup> Z. Y. Wu<sup>b</sup>, J. Qian<sup>b\*</sup>, Y.G. Yan<sup>c</sup>, J. Wei<sup>b</sup>, H. Li<sup>c</sup>, J. C. Su<sup>d\*</sup>

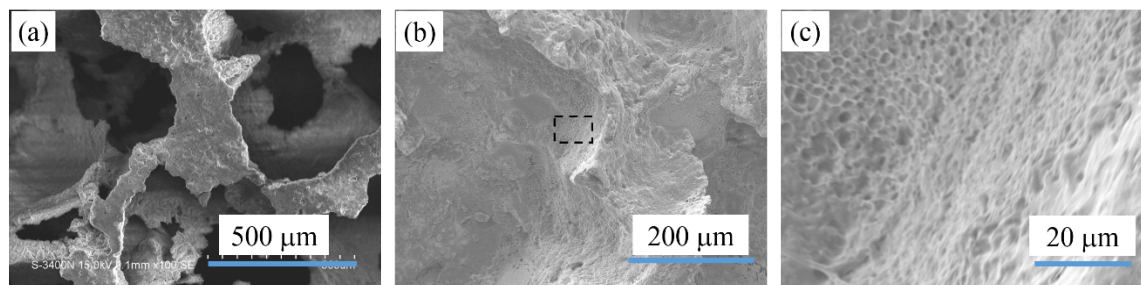

**Figure S1.** (a) Representative SEM image of scaffolds demonstrating the interconnected pores. (b) The SEM image showing the inside view of CH-CPC scaffolds. The sample was prepared by cracking the scaffold in liquid nitrogen. (c) The SEM image at high magnification corresponding to the rectangular area in (b).

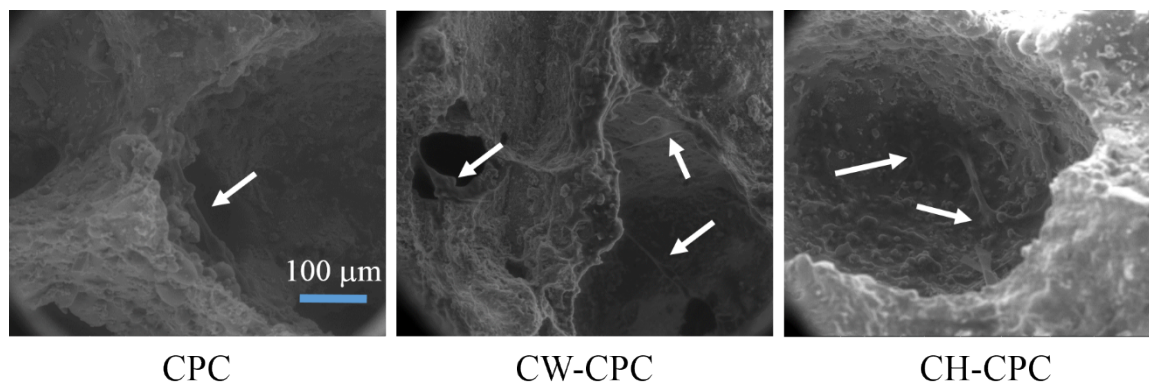

**Figure S2.** Cell adhesion on the CPC, CW-CPC, and CH-CPC scaffolds at day 1. Scale bar of 100  $\mu\text{m}$  is applicable to all. The white arrows indicate the cells inside the macropores.

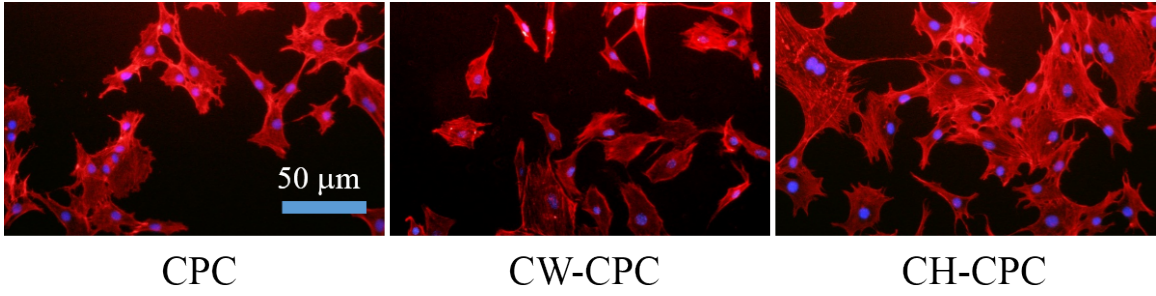

**Figure S3.** Representative fluorescent images of cells stained with RP (red) and DAPI (blue) at day 1 on CPC, CW-CPC, and CH-CPC scaffolds for measuring the cell spreading area. Scale bar of 50  $\mu\text{m}$  is applicable to all.
